# Supplementary material for: Screening of Allelochemicals in Miscanthus sacchariflorus Extracts and Assessment of Their Effects on Germination and Seedling Growth of Common Weeds
Source: PubMed Central journal article supplement (PMC7600465; doi:10.3390/plants9101313), 2020-10-05
Supplement: plants-09-01313-s001.pdf [file plants-09-01313-s001.pdf]

**Table S1.** Pearson correlation coefficients (r) between fresh weight, dry weight, seed germination (%), shoot length (cm), root length (cm), electrolyte leakage and photosynthetic pigments.

|         | DW      | FW       | GER    | ST     | RT     | EL    | CHL a    | CHL b    | CAR      | CHL a/b |
|---------|---------|----------|--------|--------|--------|-------|----------|----------|----------|---------|
| DW      | 1       |          |        |        |        |       |          |          |          |         |
| FW      | 0.939** | 1        |        |        |        |       |          |          |          |         |
| GER     | -0.220  | -0.204   | 1      |        |        |       |          |          |          |         |
| ST      | -0.078  | 0.005    | 0.447  | 1      |        |       |          |          |          |         |
| RT      | -0.228  | -0.170   | 0.292  | 0.766* | 1      |       |          |          |          |         |
| EL      | -0.778* | -0.920** | 0.195  | -0.011 | 0.135  | 1     |          |          |          |         |
| CHL a   | -0.643  | -0.491   | 0.217  | 0.230  | 0.535  | 0.328 | 1        |          |          |         |
| CHL b   | -0.457  | -0.346   | -0.064 | 0.013  | 0.435  | 0.080 | 0.809**  | 1        |          |         |
| CAR     | -0.564  | -0.387   | 0.180  | 0.083  | 0.417  | 0.146 | 0.945**  | 0.865**  | 1        |         |
| CHL a/b | 0.443   | 0.298    | -0.035 | -0.014 | -0.394 | 0.000 | -0.811** | -0.981** | -0.909** | 1       |

\*\* Correlation is significant at the 0.01 level (2-tailed). \* Correlation is significant at the 0.05 level (2-tailed). <sup>1</sup>DW; Dry weight, FW; Fresh weight, GER; seed germination rate, ST; Shoot length, RT, Root length, EL; Electrolyte leakage, CHL a; Chlorophyll a, CHL b; Chlorophyll b, CAR; Carotenoid, CHL a/b; Ratio of Chlorophyll a/ b.
